# Supplementary figures and images for: A Study and Analysis of the Relationship between Visual—Auditory Logos and Consumer Behavior
Source: MDPI journal article supplement (doi:10.3390/bs13070613), 2023-07-24

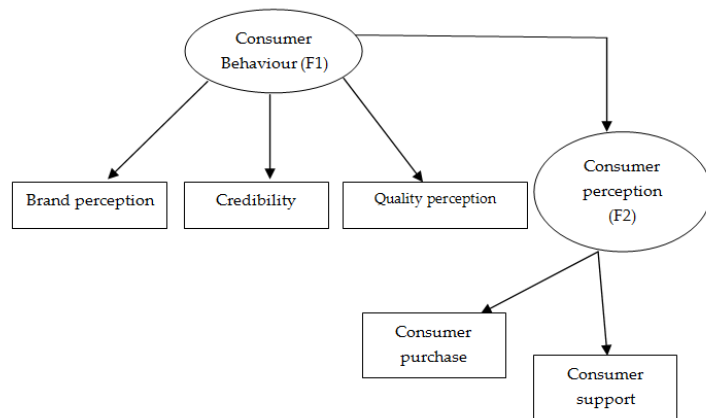

**Figure S1.** Confirmatory Factor Analysis (CFA).

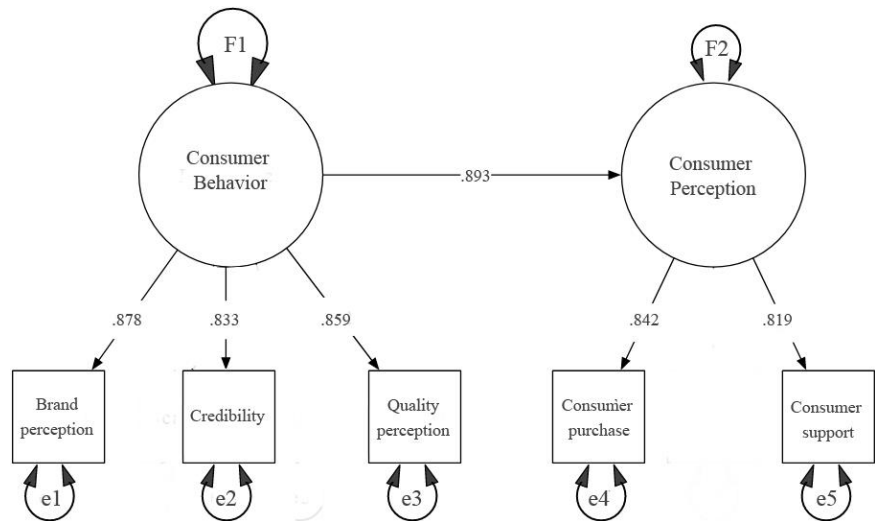

**Figure S2.** Structural equation modeling.

Supplement: s1 [file s1]
